# Supplementary material
Source: PubMed Central journal article supplement (PMC6648867)
Supplement: ao8b02319_si_001.pdf [file ao8b02319_si_001.pdf]

## Supporting Information

# Polyethyleneimine Modified UiO-66-NH<sub>2</sub>(Zr) Metal-Organic Frameworks: Preparation and Enhanced CO<sub>2</sub> Selective Adsorption

*Junjie Zhu<sup>1</sup>, Linbo Wu<sup>\*1</sup>, Zhiyang Bu<sup>1</sup>, Suyun Jie<sup>\*1</sup>, Bo-Geng Li<sup>1</sup>*

<sup>1</sup>State Key Laboratory of Chemical Engineering at ZJU, College of Chemical and Biological  
Engineering, Zhejiang University, Hangzhou 310027, China

[zhujunjie116@163.com](mailto:zhujunjie116@163.com) for Junjie Zhu

[wulinbo@zju.edu.cn](mailto:wulinbo@zju.edu.cn) for Linbo Wu

[buzhiyang@zju.edu.cn](mailto:buzhiyang@zju.edu.cn) for Zhiyang Bu

[jiesy@zju.edu.cn](mailto:jiesy@zju.edu.cn) for Suyun Jie

[bgli@zju.edu.cn](mailto:bgli@zju.edu.cn) for Bo-Geng Li

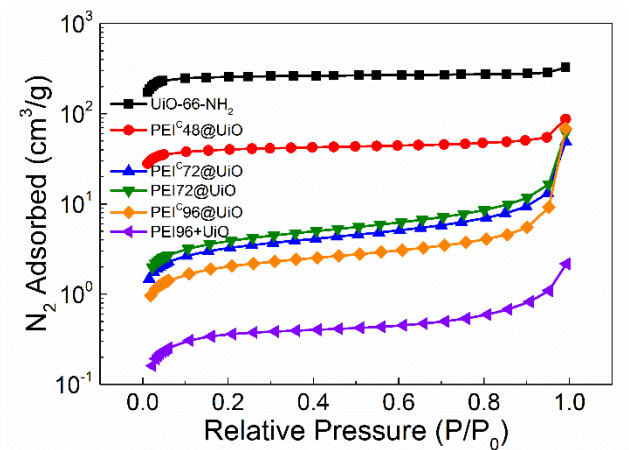

**Figure S1.** N<sub>2</sub> adsorption isotherms of pristine UiO-66-NH<sub>2</sub> and PEI-modified adsorbents.
